# Supplementary material
Source: PubMed Central journal article supplement (PMC3258601)
Supplement: 1111262109_pnas.201111262SI.pdf [file 1111262109_pnas.201111262SI.pdf]

# Supporting Information

Grote et al. 10.1073/pnas.1111262109

## SI Results and Discussion

### Genome Annotation and Analysis of *Sulfurimonas gotlandica* str. GD1.

In pairwise BLASTP comparisons of predicted proteins against the National Center for Biotechnology Information nonredundant protein database, *Sulfurimonas gotlandica* str. GD1 proteins demonstrated the greatest similarities to proteins of other *Epsilonproteobacteria*. Of the genes, 53.7% exhibited closest similarities to proteins encoded by *Sulfurimonas denitrificans* DSM 1251 (1), confirming results from the 16S rDNA analysis (2). Homologs to proteins from other members of the *Epsilonproteobacteria* include the deep-sea vent strains *Sulfurovum* sp. NBC37-1 (6.2% best matches) (3), *Nitratiruptor* sp. SB155-2 (1.3%) (3), *Nautilia profundicola* AmH (0.6%) (4), the pathogen *Acrobacter butzleri* RM4018 (5.5%) (5), *Sulfurospirillum deleyianum* DSM 6946 (3.1%) isolated from freshwater sediment (6), and *Wolinella succinogenes* DSM 1740/ATCC 29543, isolated from bovine rumen fluid (7).

Approximately 74% of all predicted *S. gotlandica* str. GD1 protein-coding genes could be assigned functions based on similarity searches. The Sox-dependent sulfur oxidation pathway consisted of the Sox multienzyme complex, arranged in two sox gene clusters containing *soxXYZAB* and *soxZYCD*, sulfite:cytochrome *c* oxidoreductase (*sor*), and sulfide:quinone oxidoreductase (*sqr*), similar to that described in several deep-sea vent *Epsilonproteobacteria* (8). Multiple copies of the *sqr* gene were found distributed within the genome (Table S3). Despite the fact that genes encoding fumarate reductases (*frdA*, *frdB*) were present in the genome, growth with alcohol was not detected and the utilization of fumarate as an electron acceptor was not observed.

## SI Materials and Methods

**Environmental Sampling.** All samples were collected in free-flow bottles attached to a conductivity, temperature, and depth-rosette. Cell numbers of *Sulfurimonas* subgroup GD17 were determined in samples collected from different locations in the central Baltic Sea, sampled between 2005 and 2009, using catalyzed reporter deposition (CARD)-FISH, as described previously (9).

**Growth Conditions.** Growth experiments were conducted in the dark at 15 °C at pressures of up to 2.5 bar and replicated up to 10 times. All growth experiments were conducted in anoxic artificial brackish water medium (ABW) modified according to Bruns et al. (10). ABW for standard growth conditions contained 95 mM NaCl, 11.2 mM MgCl<sub>2</sub> × 6H<sub>2</sub>O, 2.3 mM CaCl<sub>2</sub> × 2 H<sub>2</sub>O, 2 mM KCl, 6.4 mM Na<sub>2</sub>SO<sub>4</sub>, 2–5 mM NaHCO<sub>3</sub>, 192 μM KBr, 92 μM H<sub>3</sub>BO<sub>3</sub>, 34 μM SrCl<sub>2</sub>, 92 μM NH<sub>4</sub>Cl, 9 μM KH<sub>2</sub>PO<sub>4</sub>, 16 μM NaF, and 1–10 mM Hepes (pH 7.3). KNO<sub>3</sub> and Na<sub>2</sub>S<sub>2</sub>O<sub>3</sub> in the concentration range of 1–10 mM served as substrates for chemolithotrophic denitrification. Resazurin was added as a redox indicator. The medium was prepared and amended with supplements, as described previously (10).

To detect false-positive growth induced by potential contaminants, negative controls containing only electron donors or acceptors were used. As an additional control for the quantification of substrate turnover, sterile media without inoculi were treated and analyzed identical to the cultures. To determine the optimal growth temperature, strain GD1 was grown in ABW with 5 mM nitrate and thiosulfate over a temperature range of 4–40 °C. To examine oxygen sensitivity, GD1 growth was measured in media of varying oxygen concentration (Fig. S24). Aerobic ABW was prepared and the oxygen content was measured with an optode (POF-PST3; PreSens)

(11). Anaerobic ABW was mixed with appropriate amounts of aerobic ABW to achieve different oxygen concentrations.

Cell growth was determined by DAPI staining and flow cytometry (12), either at the starting date and after 7 d of incubation, or daily in quantitative time courses. Using 5 mM nitrate as an electron acceptor, different compounds were tested for the ability to serve as electron donors: sulfite (1 mM), sulfide (10 μM, 20 μM, 100 μM), elemental sulfur in suspension (1 mM), and hydrogen. ABW was bubbled with forming gas containing 95% nitrogen and 5% hydrogen for several hours before inoculation to test hydrogen as a potential electron donor.

Nitrite (0.6 mM, 2 mM) and fumarate (100 μM) were tested as possible electron acceptors in ABW containing 5 mM thiosulfate. Further thiosulfate (5 mM) or elemental sulfur in suspension (1 mM) were added as sole supplements. Different organic compounds were tested as possible electron donors with 5 mM nitrate serving as an electron acceptor: yeast extract (10 μg × l<sup>-1</sup>), formate (100 μM), peptone (10 μg × l<sup>-1</sup>), pyruvate (100 μM), acetate (100 μM), alcohol mix (100 μM) (butanol, ethanol, methanol, propanol), and fumarate (100 μM).

We also tested for chemoorganoheterotrophic oxygen respiration by using between 8 μM and 423 μM O<sub>2</sub> as electron acceptor; glucose, at concentrations of 10 μM to 11 mM, and peptone, between 2 ng × l<sup>-1</sup> and 2 g × l<sup>-1</sup> served, respectively, as electron donor and carbon source. Here, oxygen concentrations were adjusted by adding sterile air to anoxic medium according to Henry's law:  $c_{aq} = K_H p_{gas}$  ( $c_{aq}$  = oxygen concentration in the medium;  $K_H = 1.28 \times 10^{-3}$  mole × l<sup>-1</sup> × bar<sup>-1</sup>;  $p_{gas}$  = partial pressure of oxygen in the headspace of the culture flask).

**Chemical Analysis.** Thiosulfate, sulfite and hydrogen sulfide were quantified by HPLC-analysis using 3-(bromomethyl)-2,5,6-trimethyl-1*H*,7*H*-pyrazolo[1,2-*a*]pyrazole-1,7-dione [also known as (mono)bromobimane] derivatization, as previously described (13). Samples were diluted 1:100 before derivatization and derivatized preparations were frozen at -80 or -20 °C until processed further. HPLC-analysis equipment from Merck was used, including a LiChrosphere 60RP select B column (125 × 4 mm, 5 μm). A flow rate of 1 mL × min<sup>-1</sup> was used to pass the mobile phase [0.25% (vol/vol) acetic acid, pH 3.5, (eluent A) and HPLC grade methanol (eluent B)] over the column using the following gradient: 0 min: 0% B; 0.5 min: 0% B; 1 min: 8% B; 4.5 min: 10% B; 7 min: 32% B; 11 min: 32% B; 18 min: 50% B; 22 min: 100% B; 24 min: 100% B; 25 min: 0% B; 30 min: 0% B. After a test run, derivatized samples were diluted to a final thiosulfate concentration of less than 20 μM. The optimal linear relationship between the integrated detector signal and thiosulfate concentration is observed under these conditions. Sulfate concentration was determined turbidometrically by barium precipitation, modified as previously described (14). Here, to avoid the formation and precipitation of zero-valent sulfur from thiosulfate, samples were not acidified by citric acid. Nitrate and nitrite concentrations were determined colorimetrically using the Spongy Cadmium method (15). Oxygen contamination in all chemical analyses was minimized by extensive N<sub>2</sub> use. For nutrient analysis, cells were removed by centrifugation in N<sub>2</sub>-flushed centrifugation tubes.

**Chemotaxis.** Experiments were conducted in an anaerobic chamber to maintain anoxic conditions (COY Laboratory Products). Bacteria were pregrown in ABW with 1 mM thiosulfate and nitrate for 7–10 d. The bacterial suspension was diluted to 10<sup>5</sup> to 10<sup>6</sup> cells mL<sup>-1</sup> in nitrate-free medium and filled in 5-mL glass vacutainer

(Becton Dickinson; VACUTAINER Systems). Capillaries were filled by capillary action with ABW containing both, thiosulfate (1 mM) and nitrate (1 mM), or only thiosulfate (1 mM) as control, sealed with plasticine, and inserted into the vacutainer. After the incubation the capillaries were carefully removed, wiped with tissue paper, depleted (washed two times with sterile MQ water), filtered on black polycarbonate filters (pore size 0.2  $\mu\text{m}$ ; diameter 25 mm; Whatman), and stained with DAPI. Filters were examined with an epifluorescence microscope (Axioskop 2 mot plus; Zeiss), and equipped with a 100 Plan Apochromat oil objective lens (Zeiss). The relative response was determined as a ratio of the mean *Sulfurimonas* str. GD1 cell density in attractant-containing capillaries and the mean cell number in control capillaries (16).

**Genome Sequencing, Annotation, and Analysis.** Potential signal peptides and transmembrane helices were predicted using SignalP Ver. 2.0 (17) and TMHMM Ver. 2.0 (18), respectively, and transfer RNA genes were identified using tRNAScan-SE (19). In addition, conserved functional domains were identified using InterProScan (20) and HMMer on Pfam (21), TIGRFam (22), and PantherDB (23). Proteins involved in sensing and signal transduction were identified searching for Pfams EAL, GGDEF, Response\_reg, either one of PAS, PAS\_2, PAS\_3, PAS\_4 or PAS\_6, and either one of H-kinase\_dim, HD, HWE\_HK, HisKA\_2, HisKA\_3 or DUF2222 using hmmpfam with an e-value cutoff of  $1 \times 10^{-4}$ . Those of metabolic relevance were identified searching for Pfams APS\_kinase, ATP-sulfurylase, PAPS\_reduct in the absence of TIGR02055, SoxZ, NapD, NIR\_SIR, together with NIR\_SIR\_ferr, Succ\_DH\_flav\_C, PF02967, Oxidored\_q1\_N, Molybtopterin, CCP\_MauG, either one of NiFeSe\_Hases or Ni\_Hydr\_CYTB, TIGRFAMS TIGR02055 and PantherDB's SQR using an expected value (e-value) cutoff of  $1 \times 10^{-4}$ . E-values for Pfam's NrfD and NosD (0.01) were adjusted in a way that results matched published data. Additionally, homologs of SorA and FCC from *Ralstonia metallidurans* CH34, NrfA and NrfH from *W. succinogenes* DSMZ 1740 (e-value  $< 1 \times 10^{-30}$ ), and SoxC from *Thermus thermophilus* HB27 (e-value  $< E-35$ ) were identified using BLAST (24). E-values in BLAST searches for homologs of NorB (e-value  $< 1 \times 10^{-9}$ ) and MQR ( $< 1 \times 10^{-4}$ ) from *Pseudomonas aeruginosa*, NorC from *S. denitrificans*, the Cyt b subunit of the Cyt b/c1 complex and subunit I of the Cyt c oxidase from *Helicobacter pylori* as well as subunit II of the Cyt bd oxidase complex from *P. aeruginosa* ( $< 1 \times 10^{-10}$ ) were again adjusted to match published data.

The *S. gotlandica* str. GD1 genome was compared with the genomes of the following *Epsilonproteobacteria* (<http://www.ncbi.nlm.nih.gov>): *Caminibacter mediatlanticus* TB-2 (NZ\_ABCJ00000000), *N. profundicola* AmH (NC\_012115) (4), *Sulfurovum* sp. NBC37-1 (NC\_009663) (3), *S. deleyianum* DSM 6946 (NC\_013512) (6); *S. denitrificans* DSM 1251<sup>T</sup> (NC\_007575) (1), *Sulfurimonas autotrophica* DSM 16294 (NC\_014506) (25), *A. butzleri* RM4018 (NC\_009850) (5), and *Nitratiruptor* sp. SB155-2 (NC\_009662) (3).

**Phylogenetic Analysis.** Alignment and phylogenetic analyses of the *S. gotlandica* str. GD1 16S rRNA sequence were performed using the ARB software package (26). Sequences for analysis were reduced to unambiguously alignable positions using group-specific filters. For phylogenetic analyses, three different trees were calculated using the neighbor-joining, parsimony and maximum-likelihood (Phyml) algorithms based on nearly full-length 16S rRNA sequences ( $> 1,400$  bp). Eventually, shorter sequences were inserted into the reconstructed tree without changing the topology. For neighbor-joining, the Jukes-Cantor-Correction was applied.

**Biogeographic Distribution of *Epsilon*- and *Gammaproteobacteria* in Hypoxic Systems.** The biogeographic distribution of 16S rRNA sequences of the genera *Sulfurimonas* and *Arcobacter* as well as those of the gammaproteobacterial sulfur oxidizer SUP05 (27) were determined using the SILVA 106 database (1200/900) (28). SILVA 106 was supplemented by 1424 *Sulfurimonas*, 1840 *Arcobacter* and 27710 unclassified gammaproteobacterial sequences downloaded from the Ribosomal Database Project (RDP) database (RDP Release 10, Update 27, Aug 9, 2011) (29). Dataset options in RDP were "Type+Non Type, Uncultured +Isolates, Size:  $>1200 <1200$ , Quality: Good." Search terms within the field "isolation\_source" in SILVA were: OMZ, Saanich, Nitinat, Black Sea, upwelling, oxygen minimum zone, Cariaco, Arabia, Urania, Venezuela, Eastern Tropical, Framvaren, Mariager, Chile, Peru, redox, chemocline, \*anoxic\* \*water\*, \*sulfidic\* \*water\*, deoxygen, suboxic, Namibia, transient. In some cases, all *Sulfurimonas* and *Arcobacter* sequences were also checked manually for other potential habitats not covered by the above terms. If positive, the gammaproteobacterial sequences were specifically proven for their occurrence in these habitats. Hypoxic systems were further classified into marine sulfidic redoxclines and marine oxygen minimum zones. The occurrences of members of the *Sulfurimonas* and *Arcobacter* genera and SUP05 are given in Table S5, as well as the references for the published sequences.

- Sievert SM, et al. (2008) Genome of the epsilonproteobacterial chemolithoautotroph *Sulfurimonas denitrificans*. *Appl Environ Microbiol* 74: 1145–1156.
- Glaubitx S, et al. (2009) <sup>13</sup>C-isotope analyses reveal that chemolithoautotrophic *Gamma*- and *Epsilonproteobacteria* feed a microbial food web in a pelagic redoxcline of the central Baltic Sea. *Environ Microbiol* 11:326–337.
- Nakagawa S, et al. (2007) Deep-sea vent epsilonproteobacterial genomes provide insights into emergence of pathogens. *Proc Natl Acad Sci USA* 104:12146–12150.
- Campbell BJ, et al. (2009) Adaptations to submarine hydrothermal environments exemplified by the genome of *Nautilia profundicola*. *PLoS Genet* 5:e1000362.
- Miller WG, et al. (2007) The complete genome sequence and analysis of the epsilonproteobacterium *Arcobacter butzleri*. *PLoS ONE* 2:e1358.
- Sikorski J, et al. (2010) Complete genome sequence of *Sulfurospirillum deleyianum* type strain (5175). *Stand Genomic Sci* 2:149–157.
- Baar C, et al. (2003) Complete genome sequence and analysis of *Wolinella succinogenes*. *Proc Natl Acad Sci USA* 100:11690–11695.
- Nakagawa S, Takai K (2008) Deep-sea vent chemoautotrophs: Diversity, biochemistry and ecological significance. *FEMS Microbiol Ecol* 65:1–14.
- Grote J, Labrenz M, Pfeiffer B, Jost G, Jürgens K (2007) Quantitative distributions of *Epsilonproteobacteria* and a *Sulfurimonas* subgroup in pelagic redoxclines of the central Baltic Sea. *Appl Environ Microbiol* 73:7155–7161.
- Bruns A, Cypionka K, Overmann J (2002) Cyclic AMP and acyl homoserine lactones increase the cultivation efficiency of heterotrophic bacteria from the central Baltic Sea. *Appl Environ Microbiol* 68:3978–3987.
- Schneider B, Sadkowiak B, Wachholz F (2007) A new method for continuous measurements of O<sub>2</sub> in surface water in combination with pCO<sub>2</sub> measurements: Implications for gas phase equilibration. *Mar Chem* 103:163–171.
- Gasol JM, et al. (2004) Control of heterotrophic prokaryotic abundance and growth rate in hypersaline planktonic environments. *Aquat Microb Ecol* 34:193–206.
- Zopfi J, Ferdelman TG, Fossing H (2004) *Sulfur Biogeochemistry—Past and Present*, eds, Amend JP, Edwards KJ, Lyons TW (Geological Society of America, Boulder, Colorado), pp 97–116.
- Kraal P, Slomp CP, Forster A, Kuypers MMM, Sluijs A (2009) Pyrite oxidation during sample storage determines phosphorus fractionation in carbonate-poor anoxic sediments. *Geochim Cosmochim Acta* 73:3277–3290.
- Heuer VB, Pohlman JW, Torres ME, Elvert M, Hinrichs KU (2009) The stable carbon isotope biogeochemistry of acetate and other dissolved carbon species in deep seafloor sediments at the northern Cascadia Margin. *Geochim Cosmochim Acta* 73:3323–3336.
- Barak R, Nur I, Okon Y (1983) Detection of chemotaxis in *Azospirillum brasilense*. *J Appl Bacteriol* 53:399–403.
- Bendtsen JD, Nielsen H, von Heijne G, Brunak S (2004) Improved prediction of signal peptides: SignalP 3.0. *J Mol Biol* 340:783–795.
- Krogh A, Larsson B, von Heijne G, Sonnhammer EL (2001) Predicting transmembrane protein topology with a hidden Markov model: Application to complete genomes. *J Mol Biol* 305:567–580.
- Lowe TM, Eddy SR (1997) tRNAScan-SE: A program for improved detection of transfer RNA genes in genomic sequence. *Nucleic Acids Res* 25:955–964.
- Zdobnov EM, Apweiler R (2001) InterProScan—An integration platform for the signature-recognition methods in InterPro. *Bioinformatics* 17:847–848.
- Finn RD, et al. (2010) The Pfam protein families database. *Nucleic Acids Res* 38 (Database issue):D211–D222.
- Haft DH, Selengut JD, White O (2003) The TIGRFAMs database of protein families. *Nucleic Acids Res* 31:371–373.

23. Thomas PD, et al. (2003) PANTHER: A library of protein families and subfamilies indexed by function. *Genome Res* 13:2129–2141.
24. Altschul SF, et al. (1997) Gapped BLAST and PSI-BLAST: A new generation of protein database search programs. *Nucleic Acids Res* 25:3389–3402.
25. Sikorski J, et al. (2010) Complete genome sequence of *Sulfurimonas autotrophica* type strain (OK10T). *Stand Genomic Sci* 3:2.
26. Ludwig W, et al. (2004) ARB: A software environment for sequence data. *Nucleic Acids Res* 32:1363–1371.
27. Walsh DA, et al. (2009) Metagenome of a versatile chemolithoautotroph from expanding oceanic dead zones. *Science* 326:578–582.
28. Pruesse E, et al. (2007) SILVA: A comprehensive online resource for quality checked and aligned ribosomal RNA sequence data compatible with ARB. *Nucleic Acids Res* 35: 7188–7196.
29. Cole JR, et al. (2009) The Ribosomal Database Project: Improved alignments and new tools for rRNA analysis. *Nucleic Acids Res* 37(Database issue):D141–D145.

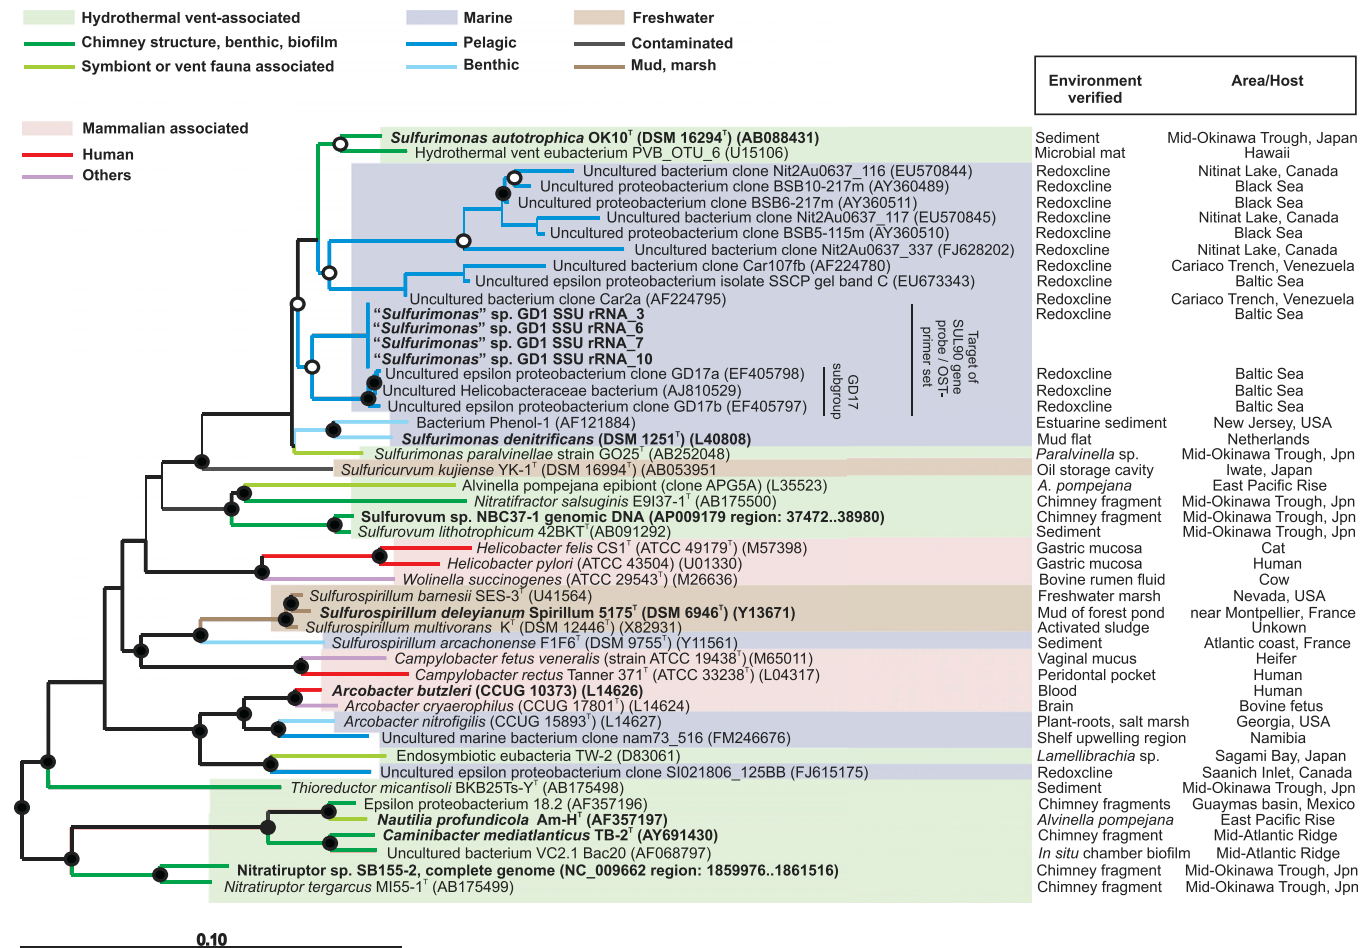

**Fig. S1.** Phylogenetic analysis of *S. gotlandica* str. GD1. Unrooted tree showing the phylogenetic relationships of isolate *S. gotlandica* str. GD1, which is calculated based on the four GD1 16S rRNA operons, and the closely related members of the *Epsilonproteobacteria*. The evolutionary distance dendrogram was reconstructed using the Jukes-Cantor correction and neighbor-joining. Branching points supported by neighbor-joining, maximum likelihood, and maximum parsimony algorithms are marked by a filled circle. Branching points supported by two algorithms are marked by an open circle. Genome-sequenced bacteria included in comparative genomics of this study are marked in bold. Target organisms of the SUL90 gene probe (1) and the OST primer set (2) are indicated. The origins of the isolates or clones are indicated by color codes of the background, the rectangles and branches, as well as descriptions on the right, and demonstrate the metabolic versatility of the *Epsilonproteobacteria*. Strain deposition and nucleotide sequence accession numbers are given in brackets. Bar, 1 estimated substitution per 100 bp.

1. Grote J, Labrenz M, Pfeiffer B, Jost G, Jürgens K (2007) Quantitative distributions of *Epsilonproteobacteria* and a *Sulfurimonas* subgroup in pelagic redoxclines of the central Baltic Sea. *Appl Environ Microbiol* 73:7155–7161.
2. Labrenz M, et al. (2004) Development and application of a real-time PCR approach for quantification of uncultured bacteria in the central Baltic Sea. *Appl Environ Microbiol* 70: 4971–4979.



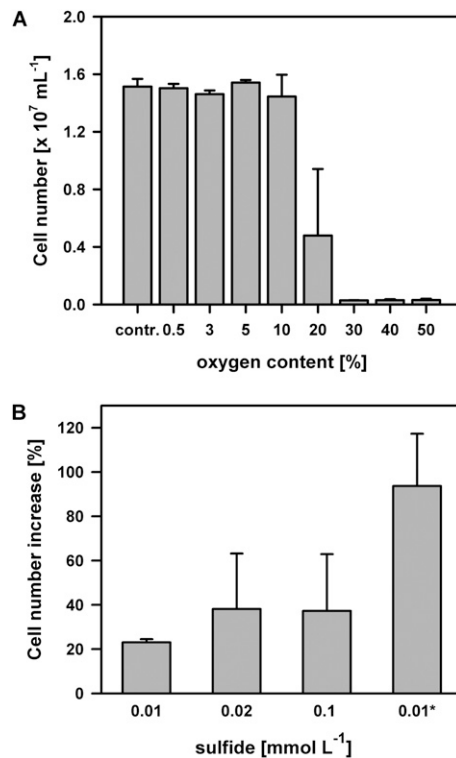

**Fig. S2.** Laboratory batch experiments with *S. gotlandica* str. GD1. (A) Oxygen sensitivity during incubation with nitrate (5 mM), thiosulfate (5 mM), and different oxygen concentrations. Cell numbers after 7 d of incubation are given. Anoxic ABW was used in the controls. Error bars indicate the SD of three replicates. (B) Growth with 5 mM nitrate and different concentrations of sulfide expressed as percent cell increase after an incubation time of 7 d. "0.01\*" Means that a concentration of 0.01 mM sulfide was added every second day. Error bars indicate the SD of three replicates. For every formed GD1-cell, 23 fmol sulfide were oxidized. During exponential growth, chemolithotrophic denitrification with sulfide as electron donor was determined to occur according to the following equation:  $6\text{HS}^- + 7\text{NO}_3^- + 4\text{H}^+ \rightarrow 4\text{SO}_4^{2-} + 2\text{S}_0 + 3.5\text{N}_2 + \text{e}^- + 5\text{H}_2\text{O}$ ; during this turnover, one molecule of  $\text{CO}_2$  was fixed.

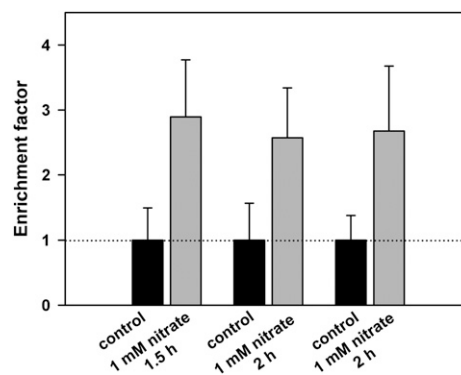

**Fig. S3.** Quantitative analysis of the chemotactic response of *S. gotlandica* str. GD1 toward nitrate containing capillaries expressed as relative response. Values of  $> 2$  indicate significant chemotactic activity. The incubation time was 1.2–2 h. Negative control capillaries contained no nitrate. The capillary assay was performed three times. Error bars indicate the SD of three to four replicates for each assay.

**Table S1. Summary of general genome features in *S. gotlandica* str. GD1**

| Feature                                                       | Value        |
|---------------------------------------------------------------|--------------|
| Size (bp)                                                     | 2,952,682    |
| G+C content (%)                                               | 33.59        |
| Total no. of coding sequences                                 | 2,879        |
| CDS density (gene/kb)                                         | 0.975        |
| Average gene length (bp)                                      | 955          |
| Coding percentage (%)                                         | 93.2         |
| Genes with function prediction (Conserved) hypothetical genes | 2,124<br>756 |
| No. of rRNA operons                                           | 4            |
| No. of tRNA genes                                             | 47           |

CDS, coding sequences.

**Table S2. Electron donors and acceptors supporting growth of *S. gotlandica* str. GD1**

| Presumed metabolic pathway       | e-Donor     | e-Acceptor       | Growth |
|----------------------------------|-------------|------------------|--------|
| Chemoautotrophic denitrification | Sulfite     | Nitrate          | +++    |
|                                  | Sulfide     | Nitrate          | +      |
|                                  | Sulfur      | Nitrate          | +++    |
|                                  | Hydrogen    | Nitrate          | +++    |
|                                  | Thiosulfate | Nitrate          | +++    |
|                                  | Thiosulfate | Nitrite (0.6 mM) | +++    |
| Heterotrophic denitrification    | Thiosulfate | Fumarate         | —      |
|                                  | Formate     | Nitrate          | +++    |
|                                  | Fumarate    | Nitrate          | —      |
|                                  | Alcohol mix | Nitrate          | —      |
|                                  | Acetate     | Nitrate          | +      |
|                                  | Yeast       | Nitrate          | ++     |
|                                  | Peptone     | Nitrate          | +++    |
| Unknown                          | Pyruvate    | Nitrate          | +++    |
|                                  | Thiosulfate | Thiosulfate      | +++    |
|                                  | Sulfur      | Sulfur           | ++     |

Experiments were conducted in ABW (15 °C) and cell numbers were determined after 7 d of incubation. Maximum cell increase is scored as +++; cell increase of > 100% is scored as ++; > 50% is scored as +; no increase is scored as —. All experiments were conducted in three replicates.

**Table S3. Key enzymes identified in *S. gotlandica* str. GD1**

| Gene name                               | Function/protein                                             | Locus tag  |
|-----------------------------------------|--------------------------------------------------------------|------------|
| <i>soxXYZAB</i>                         | Oxidation of reduced sulfur compounds                        |            |
| <i>soxX</i>                             | Sulfur oxidation protein                                     | SMGD1_0062 |
| <i>soxY</i>                             | Sulfur oxidation protein                                     | SMGD1_0061 |
| <i>soxZ</i>                             | Sulfur oxidation protein                                     | SMGD1_0060 |
| <i>soxA</i>                             | Diheme cytochrome                                            | SMGD1_0059 |
| <i>soxB</i>                             | Sulfate thiol esterase                                       | SMGD1_0058 |
| <i>SoxZYCD</i>                          |                                                              |            |
| <i>soxZ</i>                             | Sulfur oxidation protein*                                    | SMGD1_1162 |
| <i>soxY</i>                             | Sulfur oxidation protein                                     | SMGD1_1163 |
| <i>soxC</i>                             | Sulfur oxidation protein                                     | SMGD1_1165 |
| <i>soxD</i>                             | Sulfur oxidation protein                                     | SMGD1_1164 |
| <i>soxF</i>                             | Sulfide dehydrogenase                                        | SMGD1_1158 |
| <i>soxH</i>                             | Putative sulfur oxidation protein                            | SMGD1_1160 |
| <i>sorA</i>                             | Sulfite oxidoreductase                                       | SMGD1_1131 |
| <i>sorB</i>                             | Sulfite oxidoreductase                                       | SMGD1_1132 |
| <i>sqr1</i>                             | Sulfide-quinone oxidoreductase                               | SMGD1_1402 |
| <i>sqr2</i>                             | Sulfide-quinone reductase                                    | SMGD1_2084 |
| <i>sqr3</i>                             | Sulfide-quinone oxidoreductase                               | SMGD1_1224 |
| <i>sqr4</i>                             | Sulfide-quinone oxidoreductase                               | SMGD1_1167 |
| <i>sqr5</i>                             | Putative sulfide-quinone oxidoreductase                      | SMGD1_1602 |
| <i>Sir</i>                              | Sulfite reductase [ferredoxin] 2                             | SMGD1_2501 |
|                                         | Probable inorganic disproportionation                        |            |
| <i>psrC</i>                             | Polysulfide reductase, subunit C                             | SMGD1_0714 |
| <i>psrA</i>                             | Polysulfide reductase, subunit A                             | SMGD1_0713 |
| <i>psrB</i>                             | Polysulfide reductase, subunit B                             | SMGD1_0715 |
| <i>cysN</i>                             | Sulfate adenylyltransferase                                  | SMGD1_0549 |
| <i>sir</i>                              | Sulfite reductase                                            | SMGD1_2501 |
| <i>cysC</i>                             | Adenylyl-sulfate kinase                                      | SMGD1_0502 |
| <i>cysC2</i>                            | Adenylyl-sulfate kinase                                      | SMGD1_0501 |
| <i>cysN2</i>                            | Sulfate adenylyltransferase, large subunit                   | SMGD1_2502 |
| <i>cysD2</i>                            | Sulfate adenylyltransferase, small subunit                   | SMGD1_2503 |
| <i>cysH</i>                             | Phosphoadenosine phosphosulfate reductase                    | SMGD1_2505 |
| <i>cysD1</i>                            | Sulfate adenylyltransferase, small subunit                   | SMGD1_0499 |
| <i>cysN1</i>                            | Sulfate adenylyltransferase, large subunit                   | SMGD1_0500 |
|                                         | Rhodanese-related sulfurtransferase                          | SMGD1_0564 |
| <i>napAGHBFLD</i>                       | Reduction of nitrate                                         |            |
| <i>napA</i>                             | Nitrate reductase                                            | SMGD1_0589 |
| <i>napG</i>                             | Nitrate reductase                                            | SMGD1_0590 |
| <i>napH</i>                             | Nitrate reductase                                            | SMGD1_0591 |
| <i>napB</i>                             | Nitrate reductase                                            | SMGD1_0592 |
| <i>napF</i>                             | Nitrate reductase <sup>†</sup>                               | SMGD1_0593 |
| <i>napL</i>                             | Nitrate reductase                                            | SMGD1_0594 |
| <i>napD</i>                             | Nitrate reductase                                            | SMGD1_0595 |
| <i>nirS</i>                             | Cytochrome cd1 nitrite reductase                             | SMGD1_1412 |
| <i>nirF</i>                             | Nitrite reductase                                            | SMGD1_1409 |
| <i>Nir</i>                              | Ferredoxin nitrite/sulfite reductase                         | SMGD1_0402 |
| <i>nir</i>                              | Ferredoxin-nitrite reductase                                 | SMGD1_2457 |
| <i>norB</i>                             | Nitric oxide reductase                                       | SMGD1_1414 |
| <i>norC</i>                             | Nitric oxide reductase                                       | SMGD1_1415 |
| <i>narB</i>                             | Nitrate reductase                                            | SMGD1_0403 |
| <i>narK/nasA</i>                        | Nitrate transporter                                          | SMGD1_1409 |
| <i>nosZGC<sub>7</sub>C<sub>2</sub>H</i> | Reduction of nitrous oxide                                   |            |
| <i>nosZ</i>                             | Nitrous oxide reductase                                      | SMGD1_2343 |
| <i>nosG</i>                             | Nitrous oxide reductase                                      | SMGD1_2340 |
| <i>nosC1</i>                            | Nitrous oxide reductase                                      | SMGD1_2339 |
| <i>nosC2</i>                            | Nitrous oxide reductase                                      | SMGD1_2338 |
| <i>nosH</i>                             | Nitrous oxide reductase                                      | SMGD1_2337 |
| <i>nosD</i>                             | Nitrous oxidase accessory protein                            | SMGD1_2331 |
|                                         | CO <sub>2</sub> fixation via the reductive citric acid cycle |            |
| <i>oorD</i>                             | 2-Oxoglutarate:ferredoxin oxidoreductase                     | SMGD1_2658 |
| <i>oorA</i>                             | 2-Oxoglutarate:ferredoxin oxidoreductase                     | SMGD1_2659 |
| <i>oorB</i>                             | 2-Oxoglutarate:ferredoxin oxidoreductase                     | SMGD1_2660 |
| <i>oorC</i>                             | 2-Oxoglutarate:ferredoxin oxidoreductase                     | SMGD1_2661 |

Table S3. Cont.

| Gene name        | Function/protein                                       | Locus tag  |
|------------------|--------------------------------------------------------|------------|
| <i>icd</i>       | Isocitrate dehydrogenase                               | SMGD1_2649 |
| <i>acly</i>      | ATP citrate lyase ( $\alpha$ subunit)                  | SMGD1_1941 |
| <i>acly</i>      | ATP citrate lyase ( $\beta$ subunit)                   | SMGD1_1940 |
| <i>PorC</i>      | Pyruvate:ferredoxin oxidoreductase ( $\gamma$ subunit) | SMGD1_1531 |
| <i>porD</i>      | Pyruvate:ferredoxin oxidoreductase ( $\delta$ subunit) | SMGD1_1532 |
| <i>porA</i>      | Pyruvate:ferredoxin oxidoreductase ( $\alpha$ subunit) | SMGD1_1533 |
| <i>porB</i>      | Pyruvate:ferredoxin oxidoreductase ( $\beta$ subunit)  | SMGD1_1534 |
|                  | Fumarate reduction                                     |            |
| <i>frdA</i>      | Fumarate reductase                                     | SMGD1_0558 |
| <i>frdB</i>      | Fumarate reductase                                     | SMGD1_0557 |
| <i>frdC</i>      | Fumarate reductase, cytochrome <i>b</i> subunit        | SMGD1_0559 |
| <i>sdhA</i>      | Succinate dehydrogenase/fumarate reductase             | SMGD1_2779 |
| <i>sdhB</i>      | Succinate dehydrogenase/fumarate reductase             | SMGD1_2780 |
| <i>sdhC</i>      | Succinate dehydrogenase/fumarate reductase             | SMGD1_2781 |
| <i>sdhA</i>      | Succinate dehydrogenase/fumarate reductase             | SMGD1_1297 |
| <i>sdhB</i>      | Succinate dehydrogenase/fumarate reductase             | SMGD1_1298 |
| <i>mgo</i>       | Malate:quinone oxidoreductase                          | SMGD1_2188 |
|                  | Protection against oxidative stress                    |            |
| <i>sodB</i>      | Superoxide dismutase                                   | SMGD1_2634 |
| <i>ccp2</i>      | Cytochrome <i>c</i> peroxidase                         | SMGD1_1422 |
| <i>ccp3</i>      | Cytochrome <i>c</i> peroxidase                         | SMGD1_2021 |
| <i>ccp1</i>      | Cytochrome <i>c</i> peroxidase                         | SMGD1_1001 |
| <i>ccpA</i>      | Cytochrome <i>c</i> 551 peroxidase                     | SMGD1_1295 |
| <i>tsaA</i>      | Antioxidant, AhpC/Tsa family protein                   | SMGD1_1750 |
| <i>tpx</i>       | Probable thiol peroxidase                              | SMGD1_2073 |
| <i>trx</i>       | Thioredoxin                                            | SMGD1_1242 |
| <i>trx</i>       | Thioredoxin                                            | SMGD1_1640 |
| <i>trxB</i>      | Thioredoxin-disulfide reductase                        | SMGD1_1638 |
|                  | Selected chemotaxis genes                              |            |
| <i>cheB2</i>     | Chemotaxis response regulator methylesterase           | SMGD1_0384 |
| <i>cheR</i>      | MCP methyltransferase                                  | SMGD1_0382 |
| <i>cheY</i>      | Chemotaxis protein                                     | SMGD1_0379 |
| <i>cheA</i>      | Chemotaxis protein                                     | SMGD1_0378 |
| <i>chew</i>      | Adapter chemotaxis protein                             | SMGD1_0377 |
| <i>cheA</i>      | Chemotaxis protein                                     | SMGD1_0604 |
| <i>cheY</i>      | Chemotaxis protein                                     | SMGD1_0605 |
| <i>Chew</i>      | Adapter chemotaxis protein                             | SMGD1_0603 |
| <i>cheY like</i> | Response regulator receiver domain protein             | SMGD1_2098 |
| <i>cheW like</i> | Adapter chemotaxis protein                             | SMGD1_2099 |
| <i>mcp</i>       | Methyl-accepting chemotaxis protein                    | SMGD1_2100 |
| <i>cheA</i>      | Chemotaxis protein histidine kinase                    | SMGD1_2102 |
| <i>cheR</i>      | MCP methyltransferase                                  | SMGD1_2103 |
| <i>cheD</i>      | Chemoreceptor glutamine deamidase                      | SMGD1_2105 |
| <i>cheB2</i>     | Chemotaxis response regulator methylesterase           | SMGD1_2106 |
|                  | Oxidation of hydrogen by Ni/Fe hydrogenases            |            |
|                  | Cytoplasmic hydrogenases (group 2)                     |            |
| <i>hupS</i>      | Hydrogenase, small subunit                             | SMGD1_2237 |
| <i>hupV</i>      | Hydrogenase, large subunit                             | SMGD1_2238 |
|                  | Membrane bound hydrogenases (group 1)                  |            |
| <i>hydB</i>      | Hydrogenase, large subunit                             | SMGD1_2232 |
| <i>hydC</i>      | Hydrogenase, cytochrome <i>b</i> subunit               | SMGD1_2233 |
| <i>hydD</i>      | Hydrogenase, expression/formation protease             | SMGD1_2234 |
| <i>hydA</i>      | Hydrogenase, small subunit                             | SMGD1_2239 |
| <i>hydB</i>      | Hydrogenase, large subunit                             | SMGD1_2240 |
| <i>hydC</i>      | Hydrogenase, cytochrome <i>b</i> subunit               | SMGD1_2241 |
| <i>hydD</i>      | Hydrogenase, maturation protease                       | SMGD1_2242 |
| <i>hydE</i>      | Hydrogenase related protein                            | SMGD1_2243 |
| <i>hypF</i>      | Hydrogenase maturation protein                         | SMGD1_2244 |
| <i>hypB</i>      | Hydrogenase accessory protein                          | SMGD1_2247 |
| <i>hypC</i>      | Hydrogenase expression/formation protein               | SMGD1_2248 |
| <i>hypD</i>      | Hydrogenase expression/formation protein               | SMGD1_2249 |
| <i>hypE</i>      | Hydrogenase expression/formation protein               | SMGD1_2256 |

Table S3. Cont.

| Gene name    | Function/protein                                             | Locus tag  |
|--------------|--------------------------------------------------------------|------------|
| <i>hoxX</i>  | Hydrogenase maturation factor                                | SMGD1_2257 |
| <i>hypA</i>  | Hydrogenase expression/synthesis protein                     | SMGD1_2258 |
| <i>hydA</i>  | Hydrogenase, small subunit                                   | SMGD1_2366 |
| <i>hydB</i>  | Hydrogenase, large subunit                                   | SMGD1_2269 |
|              | Group 4 hydrogenases                                         |            |
| <i>hyfD</i>  | Hydrogenase, type 4, subunit D                               | SMGD1_2372 |
| <i>hyfC</i>  | Hydrogenase, type 4, component C                             | SMGD1_2373 |
| <i>hyfI</i>  | Hydrogenase, type 3 or 4, small subunit                      | SMGD1_2374 |
| <i>echE</i>  | Hydrogenase, group 4                                         | SMGD1_2383 |
| <i>echF</i>  | Hydrogenase, group 4                                         | SMGD1_2384 |
|              | Oxidation of formate                                         |            |
| <i>fdhA</i>  | Formate dehydrogenase, subunit alpha                         | SMGD1_0120 |
| <i>fdhB</i>  | Formate dehydrogenase, iron-sulfur subunit B                 | SMGD1_0121 |
| <i>fdhC</i>  | Formate dehydrogenase, gamma subunit                         | SMGD1_0122 |
| <i>fdhD</i>  | Formate dehydrogenase accessory protein                      | SMGD1_0123 |
|              | Other oxidoreductases                                        |            |
| <i>nuoA</i>  | NADH dehydrogenase, subunit A                                | SMGD1_1681 |
| <i>nuoB</i>  | NADH dehydrogenase, subunit B                                | SMGD1_1682 |
| <i>nuoC</i>  | NADH dehydrogenase, subunit C                                | SMGD1_1683 |
| <i>nuoD</i>  | NADH dehydrogenase, subunit D                                | SMGD1_1684 |
| <i>nuoF</i>  | NADH dehydrogenase, subunit F                                | SMGD1_1685 |
| <i>nuoG</i>  | NADH dehydrogenase, subunit G                                | SMGD1_1686 |
| <i>nuoG2</i> | NADH dehydrogenase, subunit G                                | SMGD1_1687 |
| <i>nuoG3</i> | NADH dehydrogenase, subunit G truncated                      | SMGD1_1688 |
| <i>nuoH</i>  | NADH dehydrogenase, subunit H                                | SMGD1_1689 |
| <i>nuoI</i>  | NADH dehydrogenase, subunit I                                | SMGD1_1690 |
| <i>nuoJ</i>  | NADH dehydrogenase, subunit J                                | SMGD1_1691 |
| <i>nuoK</i>  | NADH dehydrogenase, subunit K                                | SMGD1_1692 |
| <i>nuoL</i>  | NADH dehydrogenase, subunit L                                | SMGD1_1693 |
| <i>nuoM</i>  | NADH dehydrogenase, subunit M                                | SMGD1_1694 |
| <i>nuoN</i>  | NADH dehydrogenase, subunit N                                | SMGD1_1695 |
| <i>ndh</i>   | NADH dehydrogenase                                           | SMGD1_1716 |
|              | Molybdopterin oxidoreductase                                 | SMGD1_2428 |
|              | Molybdopterin oxidoreductase, iron sulfur subunit            | SMGD1_0405 |
| <i>ccoN</i>  | Cytochrome c oxidase, cbb3-type, subunit I                   | SMGD1_1513 |
| <i>ccoO</i>  | Cytochrome c oxidase, cbb3-type, subunit II                  | SMGD1_1514 |
| <i>ccoQ</i>  | Cytochrome c oxidase, cbb3-type, CcoQ subunit                | SMGD1_1515 |
| <i>ccoP</i>  | Cytochrome c oxidase, cbb3-type, subunit III                 | SMGD1_1516 |
| <i>petA</i>  | Ubiquinol-cytochrome c reductase, iron-sulfur subunit        | SMGD1_1545 |
| <i>petB</i>  | Ubiquinol cytochrome c oxidoreductase, cytochrome b subunit  | SMGD1_1546 |
| <i>petC</i>  | Ubiquinol cytochrome c oxidoreductase, cytochrome c1 subunit | SMGD1_1547 |

\*weak similarity.

†inter genic.





**Table S5. Biogeographic distribution of 16S rRNA sequences of the genera *Sulfurimonas* and *Arcobacter* and the gammaproteobacterial sulfur oxidizer SUP05 in marine hypoxic systems**

| Habitat                            | <i>Epsilonproteobacteria</i> |                   | <i>Gammaproteobacteria</i> | References                                                                  |
|------------------------------------|------------------------------|-------------------|----------------------------|-----------------------------------------------------------------------------|
|                                    | <i>Sulfurimonas</i>          | <i>Arcobacter</i> | SUP05                      |                                                                             |
| <b>Marine sulfidic redoxclines</b> |                              |                   |                            |                                                                             |
| Baltic Sea                         | +                            | +                 | +                          | Grote et al., 2007 (1); Brettar et al., 2006 (2); Labrenz et al., 2007 (3); |
| Black Sea                          | +                            | +                 | +                          | Vetriani et al., 2003 (4); Thamdrup et al., 2000 (5)                        |
| Cariaco Basin, Venezuela           | +                            | +                 | (-)*                       | Madrid et al., 2001 (6); Lin et al., 2006 (7), Lin et al., 2007 (8)         |
| Nitinat Lake, Canada               | +                            | +                 | +                          | Schmidtova et al., 2009 (9)                                                 |
| Saanich Inlet, Canada              | +                            | +                 | +                          | Walsh et al., 2009 (10); Zaikova et al., 2010 (11)                          |
| <b>Marine oxygen minimum zone</b>  |                              |                   |                            |                                                                             |
| Namibian upwelling                 | -                            | +                 | +                          | Lavik et al., 2009 (12)                                                     |
| Arabian Sea                        | -                            | -                 | +                          | Fuchs et al., 2005 (13)                                                     |
| Eastern tropical South Pacific     | -                            | -                 | +                          | Stevens and Ulloa, 2008 (14)                                                |

Analyses were done using the SILVA 106 database (1200/900) (15). SILVA 106 was supplemented by 1424 *Sulfurimonas*, 1840 *Arcobacter*, and 27710 unclassified gammaproteobacterial sequences downloaded from the Ribosomal Database Project (RDP) database (RDP Release 10, Update 27, Aug 9, 2011) (16). For further description see *SI Text*. +, detected; -, not detected.

\*Gammaproteobacteria are present as determined by FISH (7) or T-RFLP analyses (8), but SUP05 was not detected in a 16S rRNA clone library (6).

- Grote J, Labrenz M, Pfeiffer B, Jost G, Jürgens K (2007) Quantitative distributions of *Epsilonproteobacteria* and a *Sulfurimonas* subgroup in pelagic redoxclines of the central Baltic Sea. *Appl Environ Microbiol* 73:7155–7161.
- Brettar I, et al. (2006) Identification of a *Thiomicrospira denitrificans*-like epsilonproteobacterium as a catalyst for autotrophic denitrification in the central Baltic Sea. *Appl Environ Microbiol* 72:1364–1372.
- Labrenz M, Jost G, Jürgens K (2007) Distribution of abundant prokaryotic organisms in the water column of the central Baltic Sea with an oxic-anoxic interface. *Aquat Microb Ecol* 46: 177–190.
- Vetriani C, Tran HV, Kerkhof LJ (2003) Fingerprinting microbial assemblages from the oxic/anoxic chemocline of the Black Sea. *Appl Environ Microbiol* 69:6481–6488.
- Thamdrup B, Rosselló-Mora R, Amann R (2000) Microbial manganese and sulfate reduction in Black Sea shelf sediments. *Appl Environ Microbiol* 66:2888–2897.
- Madrid VM, Taylor GT, Scranton MI, Chistoserdov AY (2001) Phylogenetic diversity of bacterial and archaeal communities in the anoxic zone of the Cariaco Basin. *Appl Environ Microbiol* 67:1663–1674.
- Lin X, et al. (2006) Comparison of vertical distributions of prokaryotic assemblages in the anoxic Cariaco Basin and Black Sea by use of fluorescence in situ hybridization. *Appl Environ Microbiol* 72:2679–2690.
- Lin X, Scranton MI, Varela R, Chistoserdov A, Taylor GT (2007) Compositional responses of bacterial communities to redox gradients and grazing in the anoxic Cariaco Basin. *Aquat Microb Ecol* 47:57–72.
- Schmidtova J, Hallam SJ, Baldwin SA (2009) Phylogenetic diversity of transition and anoxic zone bacterial communities within a near-shore anoxic basin: Nitinat Lake. *Environ Microbiol* 11:3233–3251.
- Walsh DA, et al. (2009) Metagenome of a versatile chemolithoautotroph from expanding oceanic dead zones. *Science* 326:578–582.
- Zaikova E, et al. (2010) Microbial community dynamics in a seasonally anoxic fjord: Saanich Inlet, British Columbia. *Environ Microbiol* 12:172–191.
- Lavik G, et al. (2009) Detoxification of sulphidic African shelf waters by blooming chemolithotrophs. *Nature* 457:581–584.
- Fuchs BM, Woebcken D, Subkov MV, Burkhil P, Amann R (2005) Molecular identification of picoplankton populations in contrasting waters of the Arabian Sea. *Aquat Microb Ecol* 39: 145–157.
- Stevens H, Ulloa O (2008) Bacterial diversity in the oxygen minimum zone of the eastern tropical South Pacific. *Environ Microbiol* 10:1244–1259.
- Pruesse E, et al. (2007) SILVA: A comprehensive online resource for quality checked and aligned ribosomal RNA sequence data compatible with ARB. *Nucleic Acids Res* 35:7188–7196.
- Cole JR, et al. (2009) The Ribosomal Database Project: Improved alignments and new tools for rRNA analysis. *Nucleic Acids Res* 37(Database issue):D141–D145.
